# Supplementary material for: Impact of ion valency on the assembly of vimentin studied by quantitative small angle X-ray scattering
Source: Royal Society of Chemistry journal article supplement (doi:10.1039/c3sm52532e), 2014-01-01
Supplement: c3sm52532e.pdf [file c3sm52532e.pdf]

# Impact of ion valency on the assembly of vimentin studied by quantitative small angle X-ray scattering

Martha E. Brennich, Susanne Bauch, Ulla Vainio, Tatjana Wedig, Harald Herrmann, and Sarah Köster

## Supporting Information

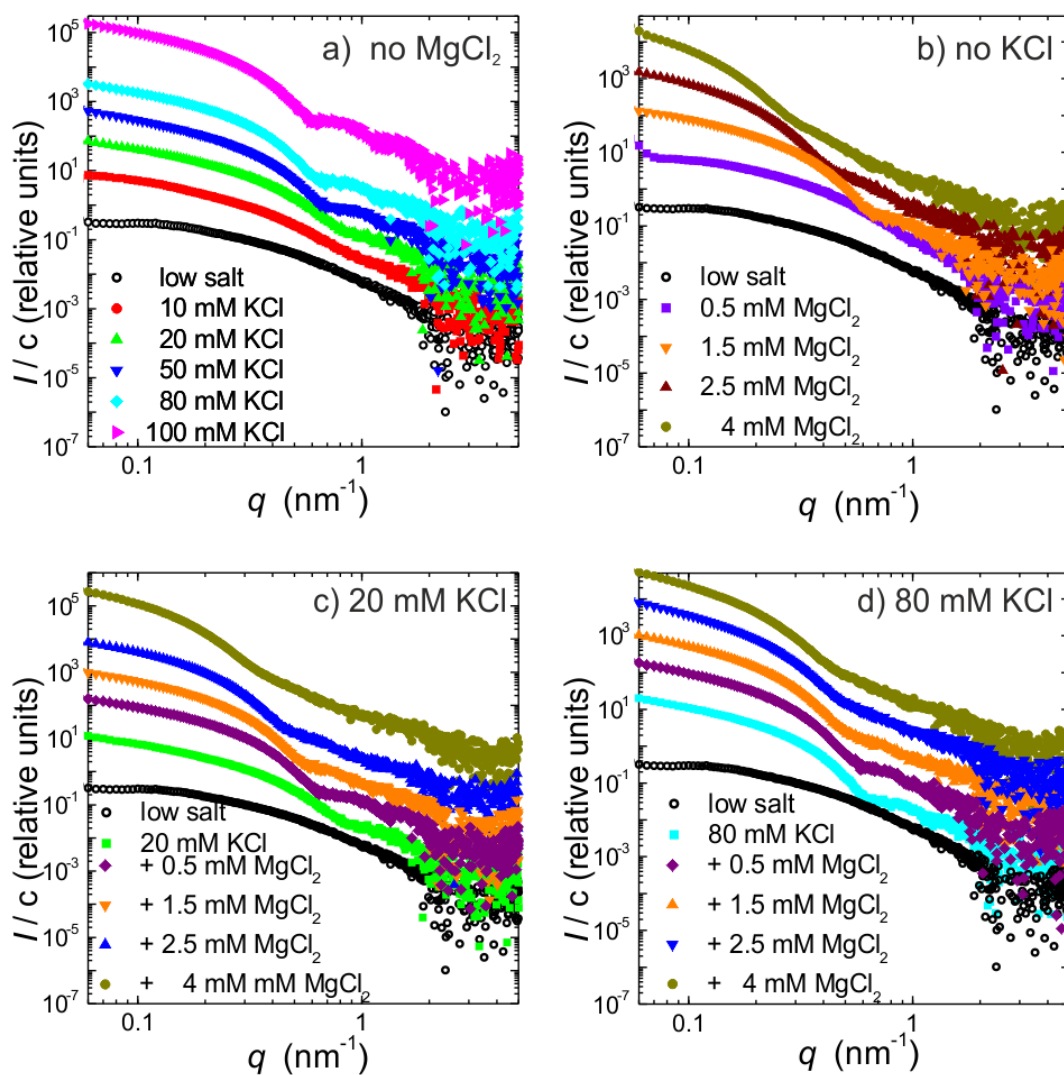

**Figure S1:** SAXS data plotted with each single experiment vertically translated in order to help to visualize all data. The subfigures correspond to a) Figure 3a, b) Figure 3c, c) Figure 4a and d) Figure 4c.

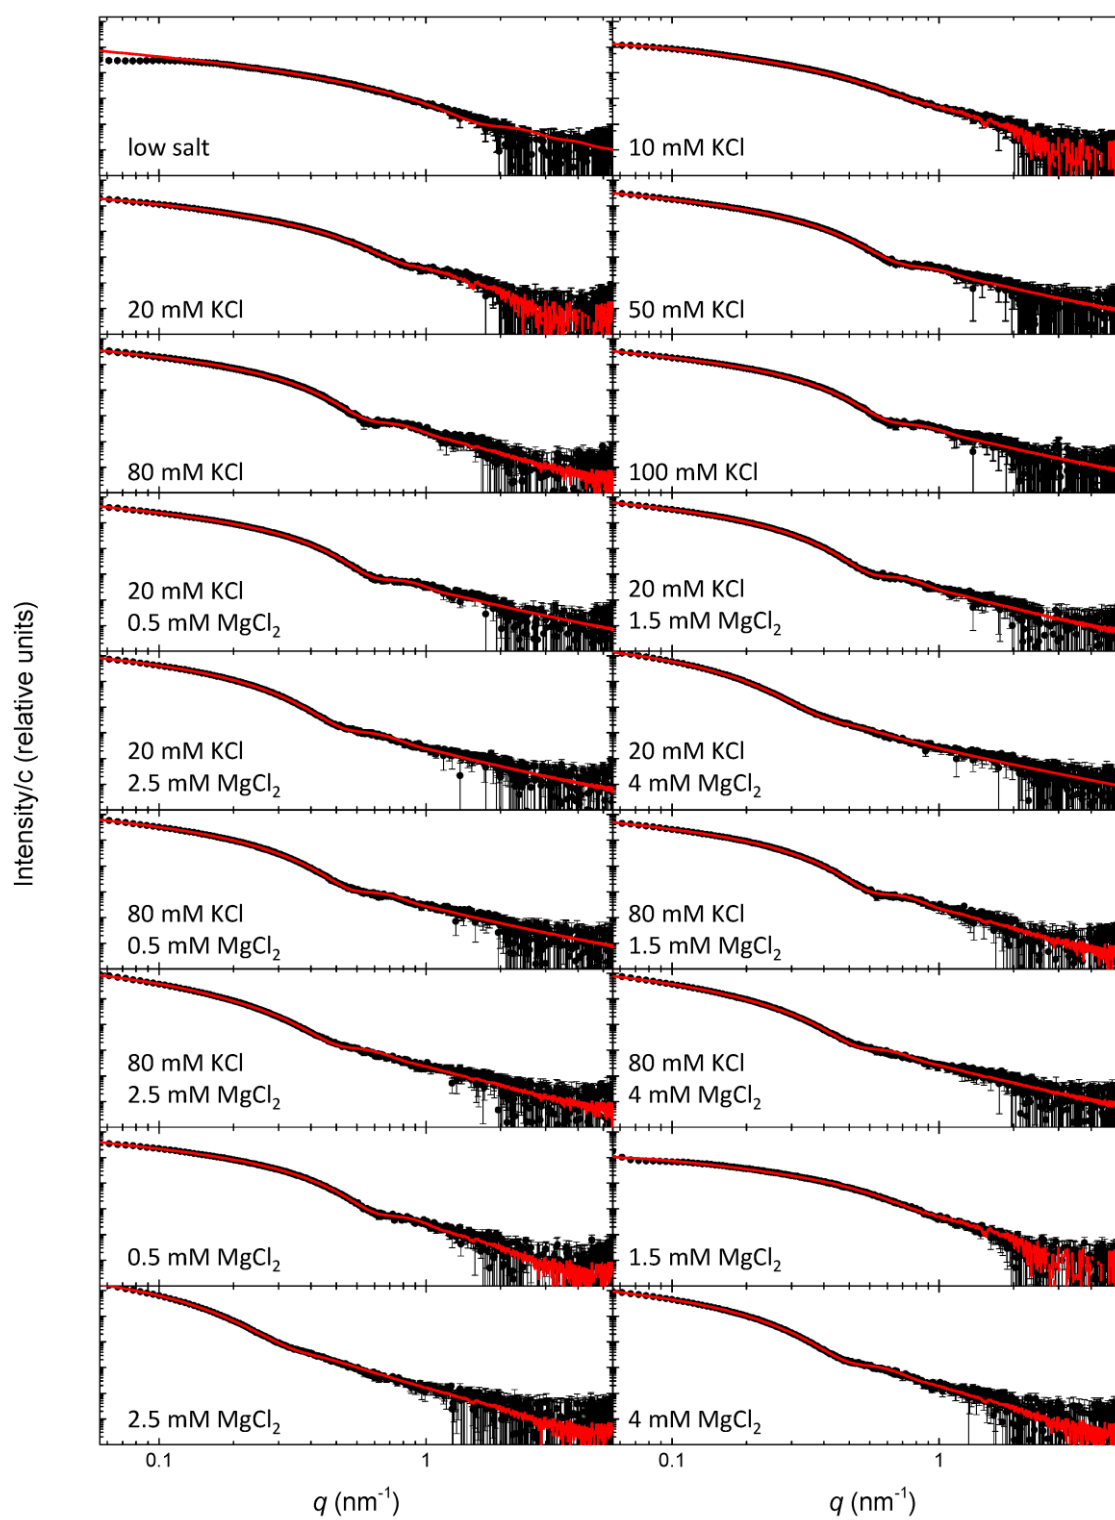

**Figure S2:** Individual fits for all salt concentration. The black symbols represent the original SAXS data, the red lines the fits.

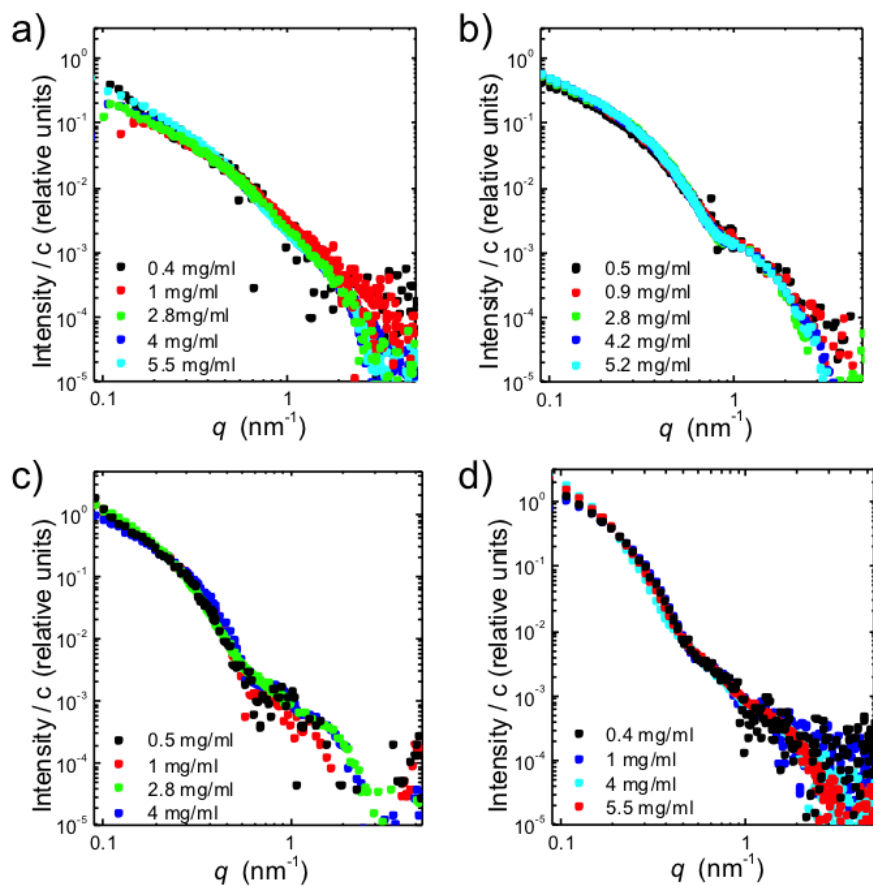

**Figure S3:** Comparison of the SAXS signal of vimentin for different protein concentrations a) in the absence of additional ions, b) at 50 mM KCl, c) at 2.5 mM MgCl<sub>2</sub> and d) at 80 mM KCl, 2.5 mM MgCl<sub>2</sub>
